# Supplementary material
Source: MDPI journal article supplement (https://www.mdpi.com/2073-4352/11/9/1129)
Supplement: s1 [file s1]

# The Structure and Property of Two Different Metal-Organic Frameworks based on N/O-Donor Mixed Ligands

**Table S1.** Bond lengths [Å] and bond angles [°] for MOFs **1** and **2**.

| 1                   |            |                     |            |
|---------------------|------------|---------------------|------------|
| Cd(1)-N(1)          | 2.2955(17) | Cd(1)-O(7)          | 2.2994(15) |
| Cd(1)-O(1)          | 2.3079(17) | Cd(1)-O(13)         | 2.3271(18) |
| Cd(1)-O(8)          | 2.5657(15) | Cd(2)-O(3)#1        | 2.2232(14) |
| Cd(2)-N(6)          | 2.2464(16) | Cd(2)-O(11)         | 2.3448(15) |
| Cd(2)-O(15)         | 2.3947(19) | Cd(2)-O(16)         | 2.408(2)   |
| Cd(2)-O(12)         | 2.4469(15) |                     |            |
| N(1)-Cd(1)-O(7)     | 141.65(6)  | N(1)-Cd(1)-O(1)     | 130.42(6)  |
| O(7)-Cd(1)-O(1)     | 87.38(6)   | N(1)-Cd(1)-O(13)    | 97.26(7)   |
| O(7)-Cd(1)-O(13)    | 87.54(7)   | O(1)-Cd(1)-O(13)    | 90.12(7)   |
| N(1)-Cd(1)-O(8)     | 88.82(5)   | O(7)-Cd(1)-O(8)     | 52.85(5)   |
| O(1)-Cd(1)-O(8)     | 139.75(5)  | O(13)-Cd(1)-O(8)    | 93.61(6)   |
| O(3)#1-Cd(2)-N(6)   | 129.30(6)  | O(3)#1-Cd(2)-O(11)  | 87.08(5)   |
| N(6)-Cd(2)-O(11)    | 143.30(6)  | O(3)#1-Cd(2)-O(15)  | 89.95(6)   |
| N(6)-Cd(2)-O(15)    | 82.57(6)   | O(11)-Cd(2)-O(15)   | 94.28(6)   |
| O(3)#1-Cd(2)-O(16)  | 90.87(6)   | N(6)-Cd(2)-O(16)    | 91.49(6)   |
| O(15)-Cd(2)-O(16)   | 172.93(6)  | O(3)#1-Cd(2)-O(12)  | 140.31(5)  |
| N(6)-Cd(2)-O(12)    | 89.02(6)   | O(11)-Cd(2)-O(12)   | 54.32(5)   |
| O(15)-Cd(2)-O(12)   | 84.77(6)   | O(16)-Cd(2)-O(12)   | 99.02(6)   |
| 2                   |            |                     |            |
| Zn(1)-O(1)          | 1.9074(19) | Zn(1)-N(1)          | 2.003(2)   |
| Zn(2)-O(6)          | 1.9940(17) | Zn(2)-N(3)#3        | 2.057(2)   |
| Zn(2)-O(3)#4        | 2.150(2)   | Zn(2)-O(7)          | 2.175(3)   |
| Zn(2)-O(4)#4        | 2.185(2)   | Zn(2)-O(8)          | 2.198(3)   |
| O(1)-Zn(1)-O(1)#2   | 116.56(16) | O(1)-Zn(1)-N(1)     | 118.56(10) |
| O(1)#2-Zn(1)-N(1)   | 98.60(9)   | O(1)-Zn(1)-N(1)#2   | 98.60(9)   |
| O(1)#2-Zn(1)-N(1)#2 | 118.56(10) | N(1)-Zn(1)-N(1)#2   | 106.70(13) |
| O(6)-Zn(2)-N(3)#3   | 102.63(8)  | O(6)-Zn(2)-O(3)#4   | 94.27(8)   |
| N(3)#3-Zn(2)-O(3)#4 | 162.48(8)  | O(6)-Zn(2)-O(7)     | 90.42(8)   |
| N(3)#3-Zn(2)-O(7)   | 89.26(10)  | O(3)#4-Zn(2)-O(7)   | 95.26(11)  |
| O(6)-Zn(2)-O(4)#4   | 154.80(8)  | N(3)#3-Zn(2)-O(4)#4 | 102.36(8)  |
| O(3)#4-Zn(2)-O(4)#4 | 60.56(8)   | O(7)-Zn(2)-O(4)#4   | 93.08(9)   |
| O(6)-Zn(2)-O(8)     | 85.42(9)   | N(3)#3-Zn(2)-O(8)   | 87.87(9)   |
| O(3)#4-Zn(2)-O(8)   | 88.93(10)  | O(7)-Zn(2)-O(8)     | 174.31(9)  |
| O(4)#4-Zn(2)-O(8)   | 92.34(9)   | O(6)-Zn(2)-C(18)#4  | 124.48(9)  |

symmetry codes: #1  $x-1, y+1, z$ , #2  $-x, y, -z+1/2$ , #3  $-x+1/2, -y+3/2, -z+1$ , #4  $x, -y+3, z+1/2$ .

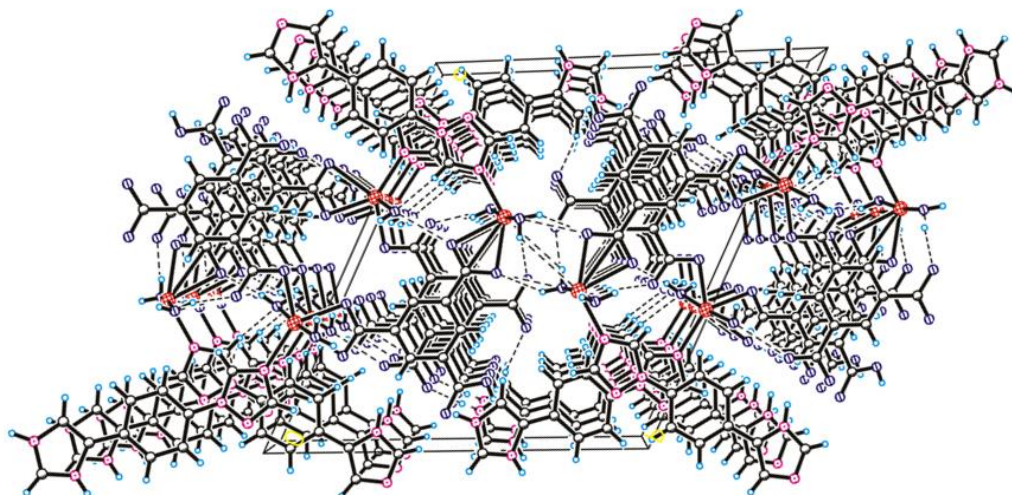

**Figure S1.** The 3D supramolecular structure of **1**.

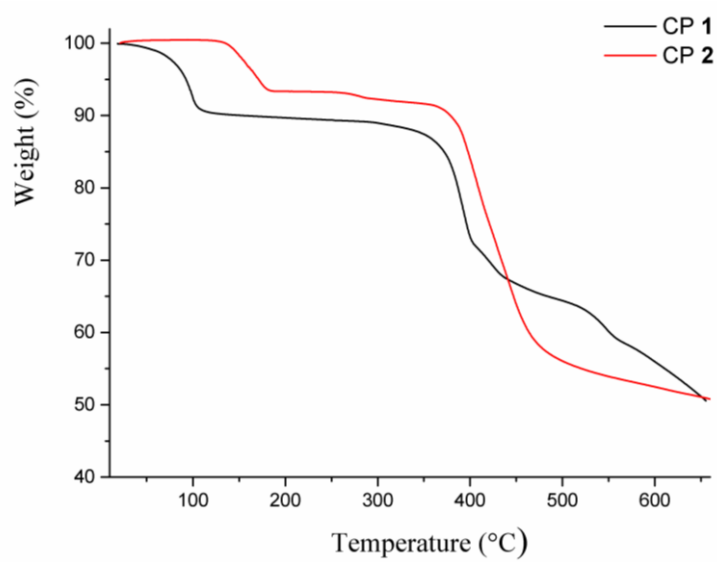

**Figure S2.** TG curves of MOFs **1** and **2**.

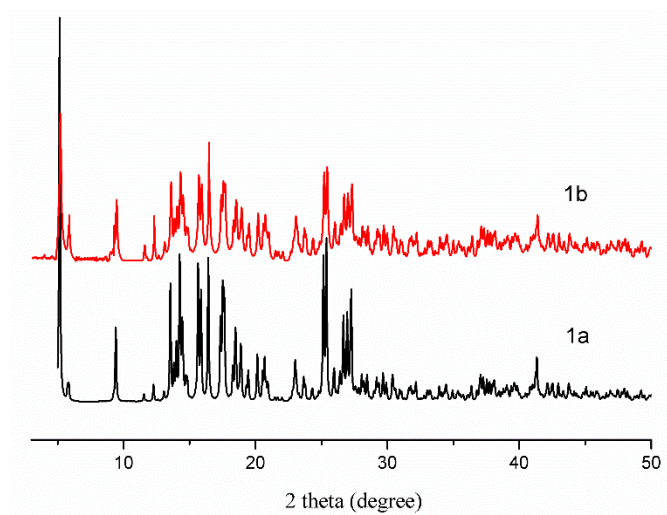

**Figure S3.** PXRD of MOF 1: a, simulated; b, experimental.

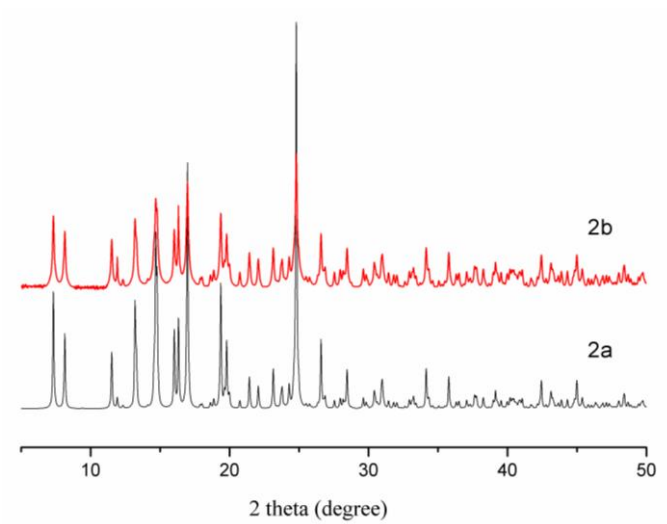

**Figure S4.** PXRD of MOF 2: a, simulated; b, experimental.
